# Supplementary material for: Interacting with Hemoglobin: Paracoccidioides spp. Recruits hsp30 on Its Cell Surface for Enhanced Ability to Use This Iron Source
Source: PubMed Central journal article supplement (PMC7823998; doi:10.3390/jof7010021), 2021-01-01
Supplement: jof-07-00021-s001.pdf [file jof-07-00021-s001.pdf]

**Supplementary Table 1.** Oligonucleotide sequences for RT-qPCR used in the present study

| <b>Genes</b> | <b>Forward sequences (5'-3')</b> | <b>Reverse sequence (5'-3')</b> |
|--------------|----------------------------------|---------------------------------|
| <i>HSP30</i> | ACTATGAAAGCCACCGCTCC             | TCTGAGAATCTGTGAACTCGAT          |
| <i>GAPDH</i> | CATGCGGGTGCCCACTGC               | AGAATAGCCGAGAATGCCCTT           |

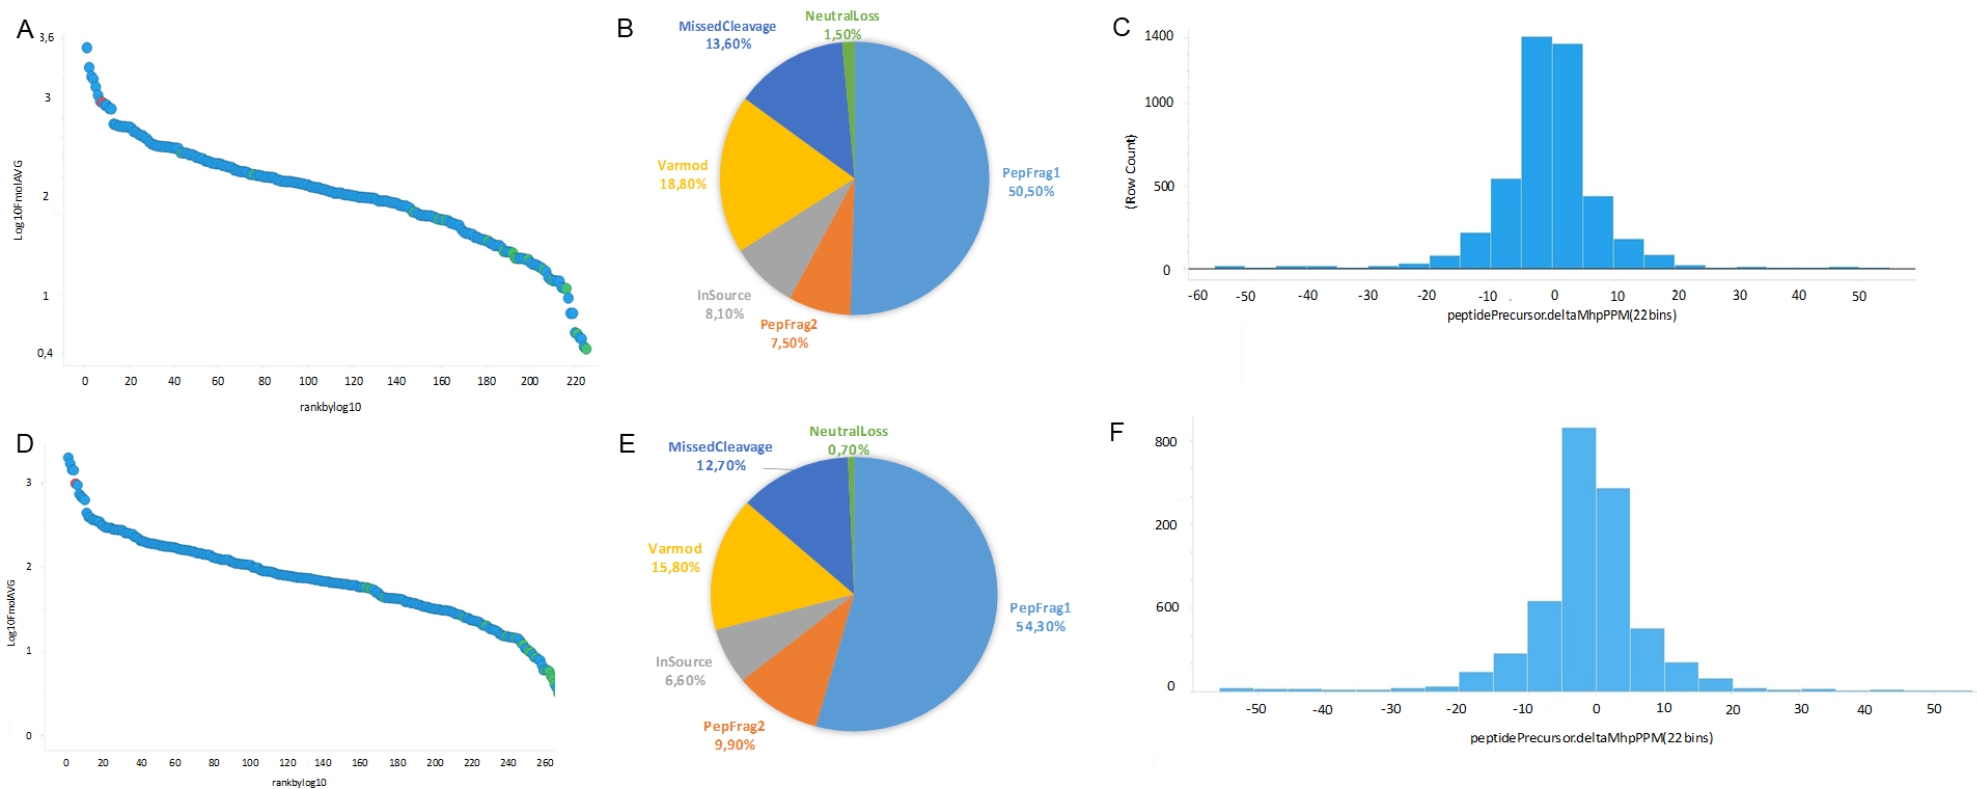

**Supplementary Figure 1.** Quality analysis of the obtained proteome. Quality charts of the proteomic analysis related to *P. lutzii* cell wall Fraction 1 obtained in the presence of hemoglobin (A) or BPS (D): Dynamic range of proteins detection, considering their abundance and molecular weight. Blue circle: proteins identified on a regular basis. Green circle: proteins identified in reverse. Red circle: standard (PHB). Type of peptides detection (B) and (E) (BPS): PepFrag1 and PepFrag2: mode of identification in the *Paracoccidoides* database by PLGS. VarMod: variable modifications. InSource: fragmentation occurred at the ionization source. MissedCleavage: loss of cleavage by trypsin. NeutralLoss: loss of precursors of water, ammonia and / or phosphoric acid. Mass Accuracy (C) (Hb) and (F) (BPS): The graph shows accuracy in the detection of peptide masses, in which 61.9% of the peptides identified in haemoglobin condition and 62,2% of the peptides identified in BPS condition had a mass error of 5 ppm. Additional analysis

showed false positives in 0.63% of the detected peptides from haemoglobin condition, low value that allows proteomic analysis to be performed. False positives were not identified in the BPS condition. Analysis based on (GEROMANOS et al., 2009).

**Supplementary Table 2.** Upregulated proteins identified in Fraction 1 (F1) of cell wall, extracted by treatment with SDS, after *Paracoccidioides lutzii* yeast cells exposition to hemoglobin for 48 hours

| Accession Number <sup>a</sup> | Description <sup>b</sup>                   | Score <sup>c</sup> | Expression levels Ratio<br>(Hb/BPS) <sup>d</sup> | SignalP <sup>e</sup> | SecretomeP <sup>f</sup> |
|-------------------------------|--------------------------------------------|--------------------|--------------------------------------------------|----------------------|-------------------------|
| PAAG_00435                    | (R)-benzylsuccinyl-CoA dehydrogenase       | 1048,6             | 1.92                                             | -                    | -                       |
| PAAG_00773                    | 14-3-3 family protein epsilon              | 2559,6             | 1.75                                             | -                    | -                       |
| PAAG_00871                    | 30 kDa heat shock protein                  | 754,8              | *                                                | -                    | 0.786                   |
| PAAG_01870                    | 3-oxoacyl-[acyl-carrier protein] reductase | 483,2              | 1.86                                             | -                    | -                       |
| PAAG_02111                    | 40S ribosomal protein S0                   | 3130,3             | 1.55                                             | -                    | -                       |
| PAAG_08955                    | 40S ribosomal protein S1                   | 672,2              | 1.62                                             | -                    | 0.720                   |
| PAAG_06367                    | 40S ribosomal protein S11                  | 3734,9             | 1.68                                             | -                    | -                       |
| PAAG_08634                    | 40S ribosomal protein S12                  | 1542,5             | 1.80                                             | -                    | -                       |
| PAAG_01413                    | 40S ribosomal protein S17                  | 1850,1             | *                                                | -                    | 0.738                   |
| PAAG_09043                    | 40S ribosomal protein S2                   | 982,0              | 2.01                                             | -                    | -                       |
| PAAG_03322                    | 40S ribosomal protein S20                  | 1303,5             | 1.63                                             | -                    | 0.750                   |

---

|            |                                                     |        |      |   |       |
|------------|-----------------------------------------------------|--------|------|---|-------|
| PAAG_07847 | 40S ribosomal protein S26E                          | 409,6  | *    | - | 0.613 |
| PAAG_02634 | 40S ribosomal protein S6-A                          | 3851,9 | 1.65 | - | -     |
| PAAG_00468 | 4-aminobutyrate aminotransferase                    | 977,2  | 1.75 | - | 0.601 |
| PAAG_00724 | 60S ribosomal protein L11                           | 2233,1 | 1.51 | - | -     |
| PAAG_00969 | 60S ribosomal protein L15                           | 4374,1 | 1.60 | - | -     |
| PAAG_00430 | 60S ribosomal protein L2                            | 360,1  | 1.55 | - | 0.853 |
| PAAG_00952 | 60S ribosomal protein L20                           | 1022,6 | 1.67 | - | 0.712 |
| PAAG_01050 | 60S ribosomal protein L30                           | 3630,4 | 1.67 | - | -     |
| PAAG_01178 | 6-phosphogluconate dehydrogenase. decarboxylating 1 | 1568,3 | 1.73 | - | -     |
| PAAG_07786 | Acetyl-CoA acetyltransferase                        | 1043,1 | 4.10 | - | 0.655 |
| PAAG_03532 | Actin                                               | 3976,5 | 1.70 | - | -     |
| PAAG_08620 | ADP, ATP carrier protein                            | 7031,9 | 1.63 | - | -     |
| PAAG_00403 | Alcohol dehydrogenase 1                             | 562,0  | 2.89 | - | -     |
| PAAG_05249 | Aldehyde dehydrogenase                              | 1357,1 | 1.86 | - | -     |
| PAAG_02603 | Aspartate aminotransferase                          | 303,7  | 1.92 | - | -     |

---

|            |                                                |        |      |       |       |
|------------|------------------------------------------------|--------|------|-------|-------|
| PAAG_05117 | Aspartate-tRNA(Asn) ligase                     | 565,1  | 5.53 | -     | 0.609 |
| PAAG_04838 | ATP synthase subunit 4, mitochondrial          | 663,4  | 1.51 | -     | 0.781 |
| PAAG_04820 | ATP synthase subunit alpha, mitochondrial      | 1625,2 | 1.93 | -     | -     |
| PAAG_04570 | ATP synthase subunit D, mitochondrial          | 2347,4 | 1.54 | -     | -     |
| PAAG_00689 | ATP-dependent RNA helicase eIF4A               | 3109,0 | 1.92 | -     | -     |
| PAAG_04511 | ATP-dependent RNA helicase SUB2                | 2259,1 | 1.60 | -     | 0.722 |
| PAAG_03701 | BAR domain-containing protein                  | 844,8  | 2.48 | -     | 0.614 |
| PAAG_00731 | Bifunctional purine biosynthesis protein ADE17 | 767,5  | 1.72 | -     | -     |
| PAAG_05518 | Cell division control protein 48               | 295,9  | 1.63 | -     | -     |
| PAAG_00797 | Chaperone DnaJ                                 | 1577,9 | 1.99 | -     | -     |
| PAAG_01262 | Chaperone DnaK                                 | 2982,3 | 1.57 | 0.864 | -     |
| PAAG_08075 | Citrate synthase. mitochondrial                | 730,3  | 1.99 | -     | -     |
| PAAG_08088 | Cytochrome b-c1 complex subunit 2              | 603,4  | 1.54 | -     | -     |
| PAAG_03292 | Cytochrome c peroxidase, mitochondrial         | 3045,4 | 1.60 | -     | 0.809 |
| PAAG_06751 | DNA damage checkpoint protein rad24            | 1203,8 | 2.05 | -     | -     |

|            |                                                              |         |      |       |       |
|------------|--------------------------------------------------------------|---------|------|-------|-------|
| PAAG_00173 | Electron transfer flavoprotein subunit alpha                 | 465,5   | 1.88 | -     | 0.642 |
| PAAG_03556 | Elongation factor 1 gamma domain-containing protein          | 998,9   | 1.77 | -     | -     |
| PAAG_11418 | Elongation factor 1-alpha                                    | 14708,7 | 1.79 | -     | -     |
| PAAG_00594 | Elongation factor 2                                          | 3787,4  | 1.51 | -     | -     |
| PAAG_00850 | Glutamine-fructose-6-phosphate<br>(isomerizing) transaminase | 1305,8  | 1.65 | -     | 0.693 |
| PAAG_08093 | GTP-binding protein ypt3                                     | 690,3   | 2.05 | -     | -     |
| PAAG_03900 | GTP-binding protein YPT52                                    | 440,3   | *    | -     | -     |
| PAAG_06811 | Heat shock protein STI1                                      | 379,4   | *    | -     | -     |
| PAAG_07098 | Histone H4.1                                                 | 4254,4  | 1.62 | -     | -     |
| PAAG_00126 | Histone H4.2                                                 | 4337,0  | 1.62 | 0.792 | -     |
| PAAG_08003 | HSP72-like protein                                           | 4380,2  | 1.73 | -     | -     |
| PAAG_07775 | HSP75-like protein                                           | 472,9   | 2.10 | -     | -     |
| PAAG_05679 | HSP90-like protein                                           | 8089,5  | 1.68 | -     | -     |
| PAAG_02130 | HSP98-like protein                                           | 572,8   | 2.08 | -     | -     |

|            |                                                              |        |      |       |       |
|------------|--------------------------------------------------------------|--------|------|-------|-------|
| PAAG_00053 | Malate dehydrogenase, NAD-dependent                          | 1037,2 | 1.62 | -     | 0.651 |
| PAAG_02718 | Mannose-1-phosphate guanyltransferase                        | 427,5  | 2.18 | -     | -     |
| PAAG_00481 | Membrane biogenesis protein Yop1                             | 922,3  | 1.93 | -     | 0.902 |
| PAAG_01861 | Membrane-associated progesterone receptor component 1        | 443,0  | *    | -     | 0.735 |
| PAAG_02265 | Mitochondrial F1F0 ATP synthase subunit                      | 1739,0 | 1.99 | -     | -     |
| PAAG_12425 | Mitochondrial outer membrane protein porin                   | 1423,3 | 1.93 | -     | -     |
| PAAG_06891 | mRNA binding post-transcriptional regulator (Csx1)           | 1068,9 | 2.23 | -     | -     |
| PAAG_12076 | NAD(P)H:quinone oxidoreductase, type IV                      | 1770,3 | 1.55 | 0.718 | -     |
| PAAG_00953 | NADH-cytochrome b5 reductase 2                               | 544,5  | 1.62 | -     | -     |
| PAAG_05735 | NADH-ubiquinone oxidoreductase 49 kDa subunit, mitochondrial | 668,4  | 2.05 | -     | 0.675 |
| PAAG_08100 | O-acetylhomoserine (thiol)-lyase                             | 313,5  | 2.29 | -     | -     |
| PAAG_01321 | Oxidoreductase 2-nitropropane dioxygenase family             | 2254,9 | 1.79 | -     | 0.707 |
| PAAG_00739 | Peptidyl-prolyl cis-trans isomerase B                        | 583,7  | 1.65 | 0.641 | -     |



|            |                                            |        |      |   |       |
|------------|--------------------------------------------|--------|------|---|-------|
| PAAG_03334 | Peptidyl-prolyl cis-trans isomerase D      | 4124,6 | 1.99 | - | -     |
| PAAG_01454 | Peroxisomal catalase                       | 2765,8 | 2.29 | - | -     |
| PAAG_08859 | Peroxisomal multifunctional enzyme         | 460,3  | 1.80 | - | -     |
| PAAG_08082 | Plasma membrane ATPase                     | 738,9  | 1.93 | - | 0.712 |
| PAAG_07957 | Pre-mRNA splicing factor                   | 539,9  | 2.69 | - | 0.801 |
| PAAG_04458 | Prohibitin-1                               | 1883,9 | 1.62 | - | -     |
| PAAG_11504 | Protein disulfide-isomerase domain         | 364,5  | *    | - | 0.783 |
| PAAG_00986 | Protein disulfide-isomerase domain         | 585,2  | 1.90 | - | -     |
| PAAG_02050 | Pyruvate decarboxylase                     | 1078,4 | 1.84 | - | -     |
| PAAG_02769 | Pyruvate dehydrogenase protein X component | 325,5  | *    | - | 0.685 |
| PAAG_00417 | Succinyl-CoA ligase subunit alpha          | 1400,3 | 1.88 | - | 0.624 |
| PAAG_02921 | Translation elongation factor Tu           | 990,0  | 1.70 | - | 0.773 |
| PAAG_03031 | Tubulin beta chain                         | 1417,8 | 1.63 | - | -     |
| PAAG_04901 | Ubiquitin-conjugating enzyme               | 555,9  | 1.79 | - | 0.883 |
| PAAG_12424 | Voltage-dependent anion channel protein 1  | 2827,7 | 1.54 | - | 0.761 |

<sup>a</sup>Protein accession number in NCBI, available at <https://www.ncbi.nlm.nih.gov/protein>.

<sup>b</sup>Description of the protein in the *Paracoccidioides* spp. databank, available in <https://www.uniprot.org/uniprot/?query=paracoccidioides+lutzii&sort=score>.

<sup>c</sup>Score that points to the quality of protein identification. Only proteins with satisfactory score values were included in the analysis.

<sup>d</sup>Ratio between quantification of proteins identified in hemoglobin/iron deprivation. Values  $\geq 1.5$  indicate upregulated proteins; (\*) indicates that the protein was identified only upon hemoglobin treatment.

<sup>e</sup>Prediction of signal peptide presence; score must be  $\geq 0.45$ ; prediction performed by SignalP 4.1 available at <http://www.cbs.dtu.dk/services/SignalP/>. (-) indicates that the signal peptide was not identified.

<sup>f</sup>Prediction of protein secretion by non-classical pathways. whose score must be  $\geq 0.6$ ; prediction performed by SecretomeP 2.0 available at <http://www.cbs.dtu.dk/services/SecretomeP/>. (-) indicates that the protein was not predicted as secreted.

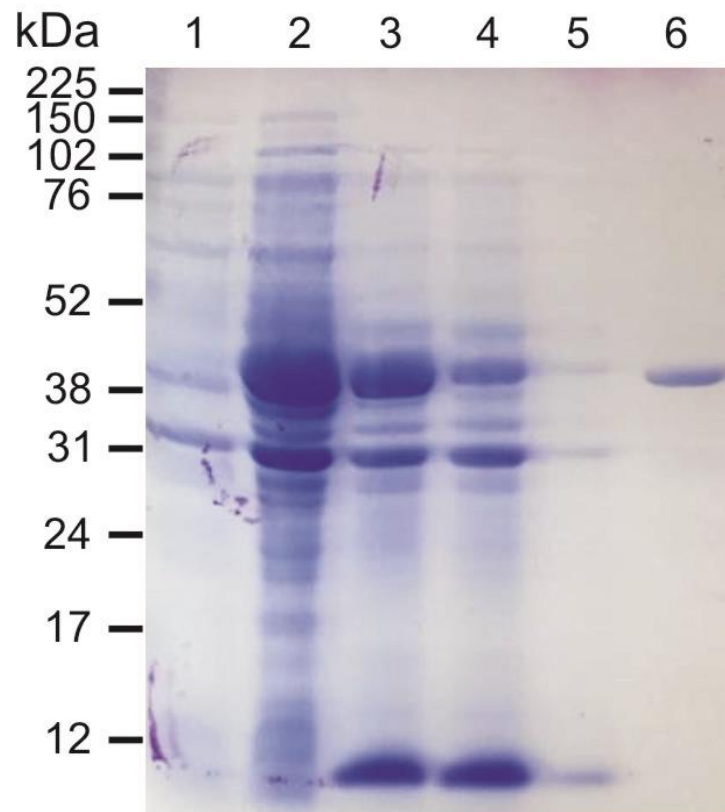

**Supplementary Figure 2.** Expression and purification of *PbHSP30*. Heterologous expression of *PbHSP30*. 1 – *E. coli* C43 bacteria harbouring the plasmid pET-32a containing the *HSP30* coding sequence without the addition of IPTG. 2 – Induction of *HSP30* expression with IPTG 0.1 mM for 16 h in the bacteria *E. coli* C43 harbouring the plasmid pET-32a containing the *HSP30* coding sequence. 3 – Pellet of the protein extract from *HSP30* induction after sarcosyl treatment. 4 – supernatants of the protein extract from *HSP30* induction after sarcosyl treatment. 5 - nickel resin washing. 6 – purification of the *HSP30* recombinant protein through nickel resin. The estimated molecular weight of the recombinant protein is 46 kDa.

**Supplementary Table 3.** Analysis of all-atom contacts and geometry of the HSP30-hemoglobin complex

| <b>Protein Geometry</b> | <b>Before DM</b> | <b>Percentage</b> | <b>After DM</b> | <b>Percentage</b> |
|-------------------------|------------------|-------------------|-----------------|-------------------|
| Poor rotamers           | 85               | 19.50%            | 14              | 2.13%             |
| Favored rotamers        | 300              | 68.81%            | 600             | 91.19%            |
| Ramachandran outliers   | 29               | 7.53%             | 10              | 1.25%             |
| Ramachandran favored    | 293              | 76.10%            | 726             | 90.41%            |
| Bad bonds               | 103              | 1.60%             | 0               | 0.00%             |
| Twisted peptides        | 11               | 2.14%             | 5               | 0.62%             |

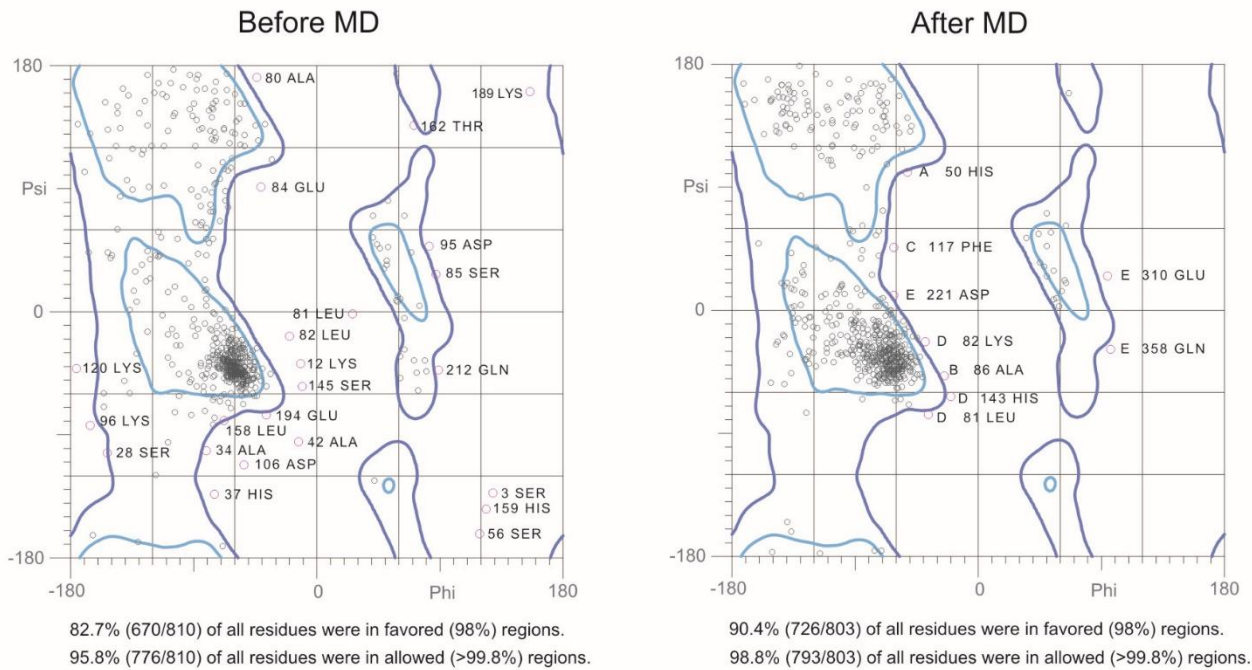

**Supplementary Figure 3.** Ramachandran plots evaluation. Ramachandran plots showing the analysis of residues in allowed, favored and forbidden regions (**A**) before and (**B**) after the HSP30-hemoglobin complex molecular dynamics. The light blue lines represent favorable regions, and the dark blue lines represent allowed regions. Regions outside blue lines represent forbidden regions and may characterize very flexible regions of either HSP30 or hemoglobin. The plots show that stereochemistry of the complex improved considerably after molecular dynamics.

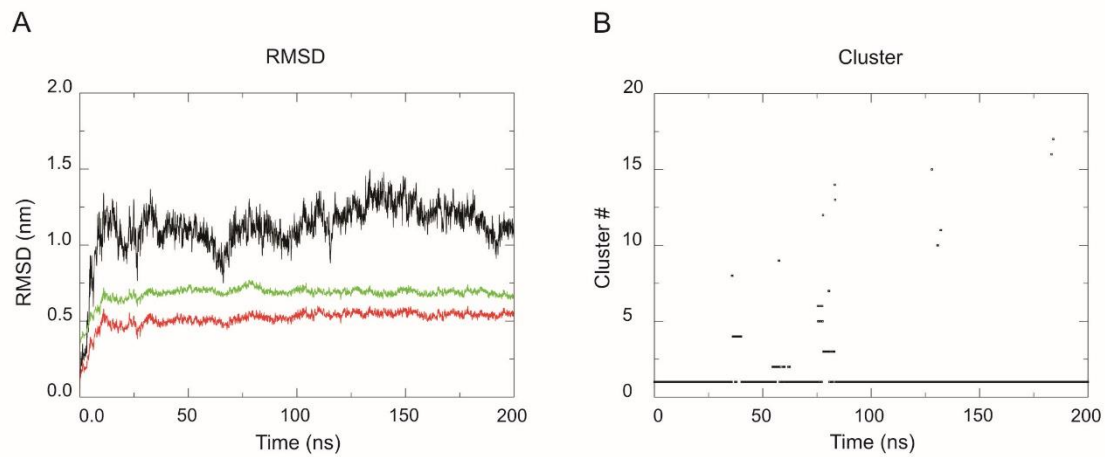

**Supplementary Figure 4.** Molecular Dynamics assessment. **(A)** RMSD (root mean square deviation) trajectories over 200 ns of the complex simulation. The complex formed by the interaction between HSP30 and hemoglobin achieved stability around 0.5 nm (green); hemoglobin achieved stability around 0.6 nm (red) and HSP30 conformation stabilized around 1.2 nm (black). The conformational structure of the complex is more stable than the proteins involved in the interaction taken individually. **(B)** The cluster plot shows eighteen sets of conformations along the HSP30-hemoglobin complex trajectories and the first cluster shows the most stable conformation persisting throughout the simulation.

A

```

P.lutzii HSP30      MFSRRAIRSPLKASRLPSQPTSSAYRISKFSSGAIPHIYPSATTTLSNINQARNMSFFPR
Human heme oxygenase1 MERPQPD SMPQDLSEALKEATKEVH--TQAENAEFMRNFQKGQVTRDGFKLVMASLYHIY
*  . . * . * . . . * . . . : : . . . : : . . * . . . . : .

P.lutzii HSP30      LPTGDFTFPLFRLDDYESHRSVGVSSSHLGGMRTFAPRFDVREAKDAYHLDGELPGINQK
Human heme oxygenase1 VALEEEIERNKESPVFAPVYFPEELHRKAALQDLAFWYGP-RWQEVIPYTPAMQRYVKR
: . : . : . : . * : . : : * : . . . . : . : :

P.lutzii HSP30      DIEIEFTDSQTLVIKGRSERYTSSSNGEPEGDKGQKHLHQPTEDESSTSMTKTGGSSQE
Human heme oxygenase1 LHEVGRTEPELLVAH-----AYTRYLGDLSGGQVLKIAQKALDLPSSG----EGLAFFT
* : * : . : * * : * * . . . * : * : * : * * * :

P.lutzii HSP30      VGSVREGVKYWVSERS-VGEFSRTFSFPTRVDQNAV KASLKN GILSVIIPKMSAPTSKKI
Human heme oxygenase1 FPNIASATKFKQLYRSRMNSLEMTPAVRQRVIEEAKTAFLLNIQLFEELQELLTHDTKDQ
. . : . . * : * * . . . . * : . * * : * . * * * * : : : : * .

P.lutzii HSP30      TIE--
Human heme oxygenase1 SPSRA
: .

```

B

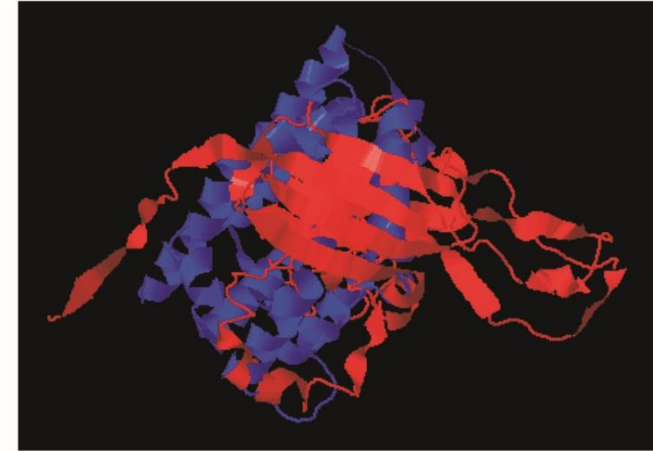

**Supplementary Figure 5.** Sequence and structural alignment of HSP30 (PAAG\_00871) and heme oxygenase 1 (P09601). **(A)** The alignment was obtained by ClustalX 2.1 program. Asterisks (\*) indicates position of complete identity, a colon (:) indicates conserved substitutions and a dot (.) indicates a semi-conserved substitution of amino acid residues. **(B)** Structural alignment was obtained by TM-align (<https://zhanglab.ccmb.med.umich.edu/TM-align/>). This algorithm is used to construct the best structural alignment between protein pairs according to the rotation of the alpha-carbons in amino acid residues.
